# Supplementary material for: Production of a Monoclonal Antibody for the Detection of Forchlorfenuron: Application in an Indirect Enzyme-Linked Immunosorbent Assay and Immunochromatographic Strip
Source: MDPI journal article supplement (doi:10.3390/bios13020239), 2023-02-07
Supplement: s1 [file s1]

# Production of a Monoclonal Antibody for the Detection of Forchlorfenuron: Application in an Indirect Enzyme-Linked Immunosorbent Assay and Immunochromatographic Strip

Xingmei Lei, A. M. Abd El-Aty, Lingyuan Xu, Jing Zhao, Jia Li, Song Gao, Yun Zhao, Yongxin She, Fen Jin, Jing Wang, Lufei Zheng, Maojun Jin and Bruce D. Hammock

## 2.1. Materials and Reagents

Female Balb/c mice (7 weeks old) were supplied by SPF (Beijing) Biotechnology Co., Ltd. (Beijing, China). The mouse Sp2/0-Ag14 myeloma cell line was supplied by the Cell Resource Center of Peking Union Medical College (Beijing, China). Forchlorfenuron (CPPU), diuron, linuron, and clopyralid standards were acquired from Dr. Ehrenstorfer GmbH (Augsburg, Germany). Gibberellic acid, thidiazuron, and clofentezine standards were secured from TM standard (Beijing, China). CPPU-hapten, complete and incomplete Freund's adjuvant, bovine serum albumin (BSA), ovalbumin (OVA), 1-(3-dimethylaminopropyl)-3-ethylcarbodiimide hydrochloride (EDC), N-hydroxysuccinimide (NHS), polyethylene glycol 2000 (PEG-2000), hypoxanthine and thymidine (HT) medium supplements, hypoxanthine, aminopterin and thymidine (HAT), dimethyl sulfoxide (DMSO), cell freezing medium dimethyl sulfoxide (DMSO; serum-free), horse-radish-peroxidase-labeled TMB (3,3',5,5'-tetramethyl benzidine) substrate solution, and 50% (w/v) polyethylene glycol solution were provided by Sigma-Aldrich (St. Louis, MO, USA). Cell culture medium (Dulbecco's modified Eagle's medium; DMEM) and fetal bovine serum (FBS) were purchased from Gibco BRL (Paisley, Scotland). GIBCO® Australian Premium FBS, GIBCO®. DMEM basic (1X) basal culture medium, L-glutamine solution, and penicillin-streptomycin solution were procured from Thermo Fisher Scientific (Waltham, MA, USA). N,N-Dimethylformamide (DMF) was supplied by Tianjin Seans Biochemical Technology Co. (Tianjin, China). Horseradish peroxidase-labeled goat anti-mouse IgG (IgG-HRP) was purchased from Jackson Immune Research Laboratories Co. (West Grove, PA, USA). Goat anti-mouse IgG, methanol, acetonitrile, hydrochloric acid (HCl), sodium chloride (NaCl), sodium hydrogen phosphate dodecahydrate disodium hydrogen phosphate dodecahydrate ( $\text{Na}_2\text{HPO}_4 \cdot 12\text{H}_2\text{O}$ ), potassium dihydrogen phosphate ( $\text{KH}_2\text{PO}_4$ ), gelatin, Tween-20, sodium carbonate ( $\text{Na}_2\text{CO}_3$ ), analytical-grade sodium bicarbonate ( $\text{NaHCO}_3$ ), citric acid monohydrate ( $\text{C}_6\text{H}_{10}\text{O}_8$ ), hydrogen peroxide ( $\text{H}_2\text{O}_2$ ), and potassium carbonate ( $\text{K}_2\text{CO}_3$ ) were obtained from Sinopharm Chemical Reagent Co. (Beijing, China).

Colloidal gold (0.01%, w/v) 40 nm, colloidal gold complex solution, nitrocellulose (NC) membranes (Sartorius CN120), polyvinyl chloride (PVC) plates, sample pads and absorbent pads were purchased from Jieyi Biotech Co, Ltd. (Shanghai, China). Syringes (1 and 5 mL) were supplied by Shandong Zhu Pharmaceutical Co. (Shandong, China). Formic acid (HPLC), ammonium formate (HPLC), and cell pipettes (1, 5, and 10 mL) were purchased from Thermo Fisher Scientific (Waltham, MA, USA). 96-MicroWell™ transparent plates, cell culture plates (6-well™, 24-well™, and 96-well™) and centrifugal tubes were secured from Costar (Corning, USA). The glassware used in the experiments was strictly cleaned and sterilized before use. The tips of the guns for cell culture were wrapped with newspaper and sterilized at 121°C for 20 min after autoclave drying before use. Cucumber samples were procured from local supermarkets (Beijing, China).

**Table S1.** Serum potency and inhibition rate of CPPU in mice. (Third immunization).

| Dilution of immunogen | 0.5×10 <sup>3</sup> |        |      | 1×10 <sup>3</sup> |        |     | 2×10 <sup>3</sup> |        |     | 4×10 <sup>3</sup> |        |     |
|-----------------------|---------------------|--------|------|-------------------|--------|-----|-------------------|--------|-----|-------------------|--------|-----|
| (Serum dilution)      | C                   | I      | IR   | C                 | I      | IR  | C                 | I      | IR  | C                 | I      | IR  |
| 2×10 <sup>3</sup>     | 3.1575              | 3.4519 | -9%  | 3.3295            | 3.0931 | 7%  | 3.4129            | 1.8489 | 46% | 3.1061            | 1.0187 | 67% |
| 4×10 <sup>3</sup>     | 2.979               | 3.5435 | -19% | 3.5799            | 2.0973 | 41% | 3.4803            | 1.28   | 63% | 3.1077            | 0.7472 | 76% |
| 8×10 <sup>3</sup>     | 3.4544              | 2.9655 | 14%  | 3.6383            | 1.4285 | 61% | 3.1615            | 0.8687 | 73% | 2.035             | 0.3826 | 81% |
| 16×10 <sup>3</sup>    | 3.4254              | 1.6507 | 52%  | 2.9929            | 0.8022 | 73% | 2.2554            | 0.4805 | 79% | 1.2281            | 0.2365 | 81% |

Note: “C” represents control wells, “I” represents inhibition wells, and “IR” represents inhibition rate. The inhibitory concentration of CPPU was 1000 ng/mL.

**Table S2.** Serum potency and inhibition rate of CPPU in mice. (Fourth immunization).

| Dilution of immunogen | 0.5×10 <sup>3</sup> |        |        | 1×10 <sup>3</sup> |        |        | 2×10 <sup>3</sup> |        |        | 4×10 <sup>3</sup> |        |        |
|-----------------------|---------------------|--------|--------|-------------------|--------|--------|-------------------|--------|--------|-------------------|--------|--------|
| (Serum dilution)      | C                   | I      | IR     | C                 | I      | IR     | C                 | I      | IR     | C                 | I      | IR     |
| 8×10 <sup>3</sup>     | 3.3838              | 2.9745 | 12.10% | 3.7764            | 1.6374 | 56.64% | 3.744             | 0.8641 | 76.92% | 3.0526            | 0.5278 | 82.71% |
| 16×10 <sup>3</sup>    | 2.7014              | 2.1559 | 20.19% | 3.1686            | 1.0018 | 68.38% | 3.3676            | 0.5876 | 82.55% | 2.4274            | 0.2995 | 87.66% |
| 32×10 <sup>3</sup>    | 3.0599              | 1.1091 | 63.75% | 2.859             | 0.5308 | 81.43% | 2.3569            | 0.3232 | 86.29% | 1.5893            | 0.1883 | 88.15% |
| 64×10 <sup>3</sup>    | 2.4069              | 0.4927 | 79.53% | 1.8739            | 0.2672 | 85.74% | 1.2435            | 0.1824 | 85.33% | 0.8106            | 0.1226 | 84.88% |

Note: “C” represents control wells, “I” represents inhibition wells, and “IR” represents inhibition rate. The inhibitory concentration of CPPU was 1000 ng/mL.

**Table S3.** The checked ic-ELISA result of ascites antibody 9G9.

| Dilution of immunogen | 2×10 <sup>3</sup>  |        |       | 4×10 <sup>3</sup>  |        |       | 16×10 <sup>3</sup>  |        |       |
|-----------------------|--------------------|--------|-------|--------------------|--------|-------|---------------------|--------|-------|
| (Serum dilution)      | C                  | I      | IR    | C                  | I      | IR    | C                   | I      | IR    |
| 2×10 <sup>3</sup>     | 3.4184             | 2.3685 | 30.7% | 3.3464             | 1.667  | 50.2% | 2.8866              | 0.5528 | 80.8% |
| 4×10 <sup>3</sup>     | 3.3394             | 1.7776 | 46.8% | 3.2532             | 1.0515 | 67.7% | 2.9336              | 0.3357 | 88.6% |
| 8×10 <sup>3</sup>     | 3.3392             | 1.1236 | 66.4% | 3.1713             | 0.68   | 78.6% | 2.8714              | 0.2378 | 91.7% |
| 16×10 <sup>3</sup>    | 3.2914             | 0.6905 | 79.0% | 3.1735             | 0.4467 | 85.9% | 2.7216              | 0.1722 | 93.7% |
| 32×10 <sup>3</sup>    | 3.1718             | 0.549  | 82.7% | 3.0324             | 0.3133 | 89.7% | 2.6577              | 0.1468 | 94.5% |
| 64×10 <sup>3</sup>    | 2.9532             | 0.3948 | 86.6% | 2.7744             | 0.25   | 91.0% | 2.3482              | 0.1259 | 94.6% |
| 128×10 <sup>3</sup>   | 2.6788             | 0.318  | 88.1% | 2.5474             | 0.2238 | 91.2% | 2.0429              | 0.1197 | 94.1% |
| 256×10 <sup>3</sup>   | 2.1066             | 0.2943 | 86.0% | 2.103              | 0.2165 | 89.7% | 1.6288              | 0.1222 | 92.5% |
| Dilution of immunogen | 32×10 <sup>3</sup> |        |       | 64×10 <sup>3</sup> |        |       | 128×10 <sup>3</sup> |        |       |
| (Serum dilution)      | C                  | I      | IR    | C                  | I      | IR    | C                   | I      | IR    |
| 2×10 <sup>3</sup>     | 2.7256             | 0.3205 | 88.2% | 2.3273             | 0.1895 | 91.9% | 1.9021              | 0.1371 | 92.8% |
| 4×10 <sup>3</sup>     | 2.5853             | 0.2034 | 92.1% | 2.1799             | 0.1237 | 94.3% | 1.6457              | 0.1025 | 93.8% |
| 8×10 <sup>3</sup>     | 2.4904             | 0.1422 | 94.3% | 2.1088             | 0.0987 | 95.3% | 1.5097              | 0.0858 | 94.3% |
| 16×10 <sup>3</sup>    | 2.3841             | 0.1154 | 95.2% | 1.9032             | 0.0891 | 95.3% | 1.347               | 0.0801 | 94.1% |
| 32×10 <sup>3</sup>    | 2.1892             | 0.1034 | 95.3% | 1.6715             | 0.0744 | 95.5% | 1.0796              | 0.076  | 93.0% |
| 64×10 <sup>3</sup>    | 1.8346             | 0.0954 | 94.8% | 1.3339             | 0.0769 | 94.2% | 0.8227              | 0.0745 | 90.9% |
| 128×10 <sup>3</sup>   | 1.5359             | 0.094  | 93.9% | 1.018              | 0.0809 | 92.1% | 0.6248              | 0.0769 | 87.7% |
| 256×10 <sup>3</sup>   | 1.1251             | 0.095  | 91.6% | 0.7308             | 0.0813 | 88.9% | 0.4723              | 0.0828 | 82.5% |

Note: “C” represents control wells, “I” represents inhibition wells, and “IR” represents inhibition rate. The inhibitory concentration of CPPU was 100 ng/mL.

**Table S4.** The checked ic-ELISA result of ascites antibody 9A10.

| Dilution of immunogen | 2×10 <sup>3</sup>  |        |         | 4×10 <sup>3</sup>  |        |        | 16×10 <sup>3</sup>  |        |        |
|-----------------------|--------------------|--------|---------|--------------------|--------|--------|---------------------|--------|--------|
| (Serum dilution)      | C                  | I      | IR      | C                  | I      | IR     | C                   | I      | IR     |
| 2×10 <sup>3</sup>     | 1.6272             | 2.9662 | -82.29% | 2.1443             | 1.4481 | 32.47% | 1.8106              | 0.3305 | 81.75% |
| 4×10 <sup>3</sup>     | 1.6972             | 2.0861 | -22.91% | 2.8353             | 0.9124 | 67.82% | 1.3893              | 0.2497 | 82.03% |
| 8×10 <sup>3</sup>     | 1.5777             | 1.2474 | 20.94%  | 2.7358             | 0.6119 | 77.63% | 1.1477              | 0.2112 | 81.60% |
| 16×10 <sup>3</sup>    | 2.3325             | 0.9615 | 58.78%  | 2.5592             | 0.5275 | 79.39% | 0.9045              | 0.197  | 78.22% |
| 32×10 <sup>3</sup>    | 2.9709             | 0.6774 | 77.20%  | 1.8761             | 0.4195 | 77.64% | 0.6921              | 0.1826 | 73.62% |
| 64×10 <sup>3</sup>    | 2.2124             | 0.5794 | 73.81%  | 1.2721             | 0.3925 | 69.15% | 0.5921              | 0.186  | 68.59% |
| 128×10 <sup>3</sup>   | 1.6379             | 0.5133 | 68.66%  | 1.0824             | 0.3726 | 65.58% | 0.5408              | 0.1776 | 67.16% |
| 256×10 <sup>3</sup>   | 1.1824             | 0.5138 | 56.55%  | 1.0252             | 0.3643 | 64.47% | 0.5123              | 0.1857 | 63.75% |
| Dilution of immunogen | 32×10 <sup>3</sup> |        |         | 64×10 <sup>3</sup> |        |        | 128×10 <sup>3</sup> |        |        |
| (Serum dilution)      | C                  | I      | IR      | C                  | I      | IR     | C                   | I      | IR     |
| 2×10 <sup>3</sup>     | 0.9169             | 0.1877 | 79.53%  | 0.5158             | 0.1354 | 73.75% | 0.2934              | 0.1155 | 60.63% |
| 4×10 <sup>3</sup>     | 0.7255             | 0.1499 | 79.34%  | 0.4364             | 0.1162 | 73.37% | 0.271               | 0.0971 | 64.17% |
| 8×10 <sup>3</sup>     | 0.606              | 0.1378 | 77.26%  | 0.3476             | 0.1064 | 69.39% | 0.2303              | 0.0933 | 59.49% |
| 16×10 <sup>3</sup>    | 0.535              | 0.1261 | 76.43%  | 0.3005             | 0.097  | 67.72% | 0.1932              | 0.0874 | 54.76% |
| 32×10 <sup>3</sup>    | 0.4288             | 0.1237 | 71.15%  | 0.2461             | 0.0884 | 64.08% | 0.1746              | 0.0861 | 50.69% |
| 64×10 <sup>3</sup>    | 0.3762             | 0.1266 | 66.35%  | 0.244              | 0.0954 | 60.90% | 0.1624              | 0.0845 | 47.97% |
| 128×10 <sup>3</sup>   | 0.385              | 0.1225 | 68.18%  | 0.2536             | 0.0957 | 62.26% | 0.1676              | 0.0878 | 47.61% |
| 256×10 <sup>3</sup>   | 0.3152             | 0.128  | 59.39%  | 0.242              | 0.1174 | 51.49% | 0.172               | 0.0914 | 46.86% |

Note: “C” represents control wells, “I” represents inhibition wells, and “IR” represents inhibition rate. The inhibitory concentration of CPPU was 100 ng/mL.

**Table S5.** The checked ic-ELISA result of ascites antibody 1B6.

| Dilution of immunogen | 2×10 <sup>3</sup>  |        |        | 4×10 <sup>3</sup>  |        |       | 16×10 <sup>3</sup>  |        |       |
|-----------------------|--------------------|--------|--------|--------------------|--------|-------|---------------------|--------|-------|
| (Serum dilution)      | C                  | I      | IR     | C                  | I      | IR    | C                   | I      | IR    |
| 2×10 <sup>3</sup>     | 2.3849             | 3.3417 | -40.1% | 2.659              | 2.0825 | 21.7% | 3.8157              | 0.4519 | 88.2% |
| 4×10 <sup>3</sup>     | 2.9152             | 2.5852 | 11.3%  | 2.8399             | 1.3301 | 53.2% | 3.8489              | 0.3482 | 91.0% |
| 8×10 <sup>3</sup>     | 3.8193             | 1.6591 | 56.6%  | 3.7097             | 0.8939 | 75.9% | 3.4479              | 0.2674 | 92.2% |
| 16×10 <sup>3</sup>    | 2.6946             | 1.2822 | 52.4%  | 3.1027             | 0.6541 | 78.9% | 3.3567              | 0.2179 | 93.5% |
| 32×10 <sup>3</sup>    | 3.4251             | 0.8691 | 74.6%  | 3.3407             | 0.5391 | 83.9% | 2.6182              | 0.1957 | 92.5% |
| 64×10 <sup>3</sup>    | 3.3325             | 0.6521 | 80.4%  | 3.3298             | 0.4092 | 87.7% | 1.6793              | 0.1797 | 89.3% |
| 128×10 <sup>3</sup>   | 2.51               | 0.5654 | 77.5%  | 2.3323             | 0.3737 | 84.0% | 1.1787              | 0.1827 | 84.5% |
| 256×10 <sup>3</sup>   | 2.0327             | 0.6321 | 68.9%  | 1.8003             | 0.4035 | 77.6% | 0.9017              | 0.1895 | 79.0% |
| Dilution of immunogen | 32×10 <sup>3</sup> |        |        | 64×10 <sup>3</sup> |        |       | 128×10 <sup>3</sup> |        |       |
| (Serum dilution)      | C                  | I      | IR     | C                  | I      | IR    | C                   | I      | IR    |
| 2×10 <sup>3</sup>     | 3.2829             | 0.2627 | 92.0%  | 2.5512             | 0.1725 | 93.2% | 1.4655              | 0.1286 | 91.2% |
| 4×10 <sup>3</sup>     | 3.0915             | 0.192  | 93.8%  | 2.1095             | 0.1375 | 93.5% | 1.2362              | 0.1139 | 90.8% |
| 8×10 <sup>3</sup>     | 2.9857             | 0.1611 | 94.6%  | 1.7683             | 0.1107 | 93.7% | 0.9349              | 0.1033 | 89.0% |
| 16×10 <sup>3</sup>    | 2.2663             | 0.1484 | 93.5%  | 1.2486             | 0.1066 | 91.5% | 0.6988              | 0.0898 | 87.1% |
| 32×10 <sup>3</sup>    | 1.6491             | 0.1245 | 92.5%  | 0.8988             | 0.104  | 88.4% | 0.4873              | 0.0875 | 82.0% |
| 64×10 <sup>3</sup>    | 1.0015             | 0.1292 | 87.1%  | 0.6237             | 0.0995 | 84.0% | 0.3619              | 0.0884 | 75.6% |
| 128×10 <sup>3</sup>   | 0.6982             | 0.1259 | 82.0%  | 0.4861             | 0.1049 | 78.4% | 0.2937              | 0.0868 | 70.4% |
| 256×10 <sup>3</sup>   | 0.5848             | 0.1298 | 77.8%  | 0.3733             | 0.1316 | 64.7% | 0.2627              | 0.0998 | 62.0% |

Note: “C” represents control wells, “I” represents inhibition wells, and “IR” represents inhibition rate. The inhibitory concentration of CPPU was 100 ng/mL.

**Table S6.** The checked ic-ELISA result of purified antibody 9G9.

| Dilution of immunogen | 2×10 <sup>3</sup>  |        |       | 4×10 <sup>3</sup>  |        |       | 16×10 <sup>3</sup>  |        |       |
|-----------------------|--------------------|--------|-------|--------------------|--------|-------|---------------------|--------|-------|
| (Serum dilution)      | C                  | I      | IR    | C                  | I      | IR    | C                   | I      | IR    |
| 4×10 <sup>3</sup>     | 3.9477             | 0.3176 | 92.0% | Overflow           | 0.1794 | -     | 3.7747              | 0.1076 | 97.1% |
| 8×10 <sup>3</sup>     | 3.9192             | 0.1967 | 95.0% | 3.9615             | 0.1185 | 97.0% | 3.4797              | 0.1262 | 96.4% |
| 16×10 <sup>3</sup>    | 2.9608             | 0.1251 | 95.8% | 2.8022             | 0.0849 | 97.0% | 2.3749              | 0.0894 | 96.2% |
| 32×10 <sup>3</sup>    | 2.0751             | 0.1113 | 94.6% | 1.7566             | 0.0891 | 94.9% | 1.4702              | 0.1223 | 91.7% |
| 64×10 <sup>3</sup>    | 1.1081             | 0.1172 | 89.4% | 0.9183             | 0.0996 | 89.2% | 0.9132              | 0.1074 | 88.2% |
| 128×10 <sup>3</sup>   | 0.6657             | 0.123  | 81.5% | 0.7233             | 0.1141 | 84.2% | 0.4674              | 0.1302 | 72.1% |
| 256×10 <sup>3</sup>   | 0.4353             | 0.1101 | 74.7% | 0.1934             | 0.1095 | 43.4% | 0.3242              | 0.115  | 64.5% |
| 512×10 <sup>3</sup>   | 0.3343             | 0.1182 | 64.6% | 0.2908             | 0.1159 | 60.1% | 0.2515              | 0.1291 | 48.7% |
| Dilution of immunogen | 32×10 <sup>3</sup> |        |       | 64×10 <sup>3</sup> |        |       | 128×10 <sup>3</sup> |        |       |
| (Serum dilution)      | C                  | I      | IR    | C                  | I      | IR    | C                   | I      | IR    |
| 4×10 <sup>3</sup>     | 2.9644             | 0.1212 | 95.9% | 1.943              | 0.1412 | 92.7% | 1.1993              | 0.1301 | 89.2% |
| 8×10 <sup>3</sup>     | 1.9627             | 0.1323 | 93.3% | 1.4608             | 0.1371 | 90.6% | 0.9904              | 0.1349 | 86.4% |
| 16×10 <sup>3</sup>    | 1.6284             | 0.109  | 93.3% | 1.0596             | 0.1116 | 89.5% | 0.6632              | 0.1091 | 83.5% |
| 32×10 <sup>3</sup>    | 0.9642             | 0.1115 | 88.4% | 0.6312             | 0.1266 | 79.9% | 0.4488              | 0.116  | 74.2% |
| 64×10 <sup>3</sup>    | 0.5638             | 0.0971 | 82.8% | 0.3745             | 0.0967 | 74.2% | 0.3016              | 0.1118 | 62.9% |
| 128×10 <sup>3</sup>   | 0.3702             | 0.1132 | 69.4% | 0.2598             | 0.1395 | 46.3% | 0.197               | 0.1241 | 37.0% |
| 256×10 <sup>3</sup>   | 0.2436             | 0.0993 | 59.2% | 0.194              | 0.1386 | 28.6% | 0.1673              | 0.1272 | 24.0% |
| 512×10 <sup>3</sup>   | 0.1895             | 0.1172 | 38.2% | 0.1765             | 0.1423 | 19.4% | 0.1718              | 0.1747 | -1.7% |

Note: “C” represents control wells, “I” represents inhibition wells, and “IR” represents inhibition rate. The inhibitory concentration of CPPU was 100 ng/mL.

**Table S7.** The checked ic-ELISA result of 9A10.

| Dilution of immunogen | 2×10 <sup>3</sup>  |        |      | 4×10 <sup>3</sup>  |        |      | 16×10 <sup>3</sup>  |        |      |
|-----------------------|--------------------|--------|------|--------------------|--------|------|---------------------|--------|------|
| (Serum dilution)      | C                  | I      | IR   | C                  | I      | IR   | C                   | I      | IR   |
| 4×10 <sup>3</sup>     | 0.8473             | 0.1616 | 81%  | 0.4811             | 0.1756 | 64%  | 0.2017              | 0.1584 | 21%  |
| 8×10 <sup>3</sup>     | 0.3881             | 0.1381 | 64%  | 0.318              | 0.1574 | 51%  | 0.1781              | 0.1517 | 15%  |
| 16×10 <sup>3</sup>    | 0.3831             | 0.1403 | 63%  | 0.2382             | 0.1207 | 49%  | 0.1389              | 0.1173 | 16%  |
| 32×10 <sup>3</sup>    | 0.2423             | 0.2726 | -13% | 0.3528             | 0.1227 | 65%  | 0.1418              | 0.1091 | 23%  |
| 64×10 <sup>3</sup>    | 0.1832             | 0.1349 | 26%  | 0.1301             | 0.1179 | 9%   | 0.1264              | 0.1222 | 3%   |
| 128×10 <sup>3</sup>   | 0.1644             | 0.1075 | 35%  | 0.1321             | 0.1294 | 2%   | 0.1684              | 0.16   | 5%   |
| 256×10 <sup>3</sup>   | 0.1885             | 0.1652 | 12%  | 0.175              | 0.1748 | 0%   | 0.1439              | 0.1196 | 17%  |
| 512×10 <sup>3</sup>   | 0.1984             | 0.1593 | 20%  | 0.154              | 0.1397 | 9%   | 0.1706              | 0.1382 | 19%  |
| Dilution of immunogen | 32×10 <sup>3</sup> |        |      | 64×10 <sup>3</sup> |        |      | 128×10 <sup>3</sup> |        |      |
| (Serum dilution)      | C                  | I      | IR   | C                  | I      | IR   | C                   | I      | IR   |
| 4×10 <sup>3</sup>     | 0.2017             | 0.1584 | 21%  | 0.2752             | 0.2735 | 1%   | 0.3102              | 0.3015 | 3%   |
| 8×10 <sup>3</sup>     | 0.1781             | 0.1517 | 15%  | 0.1348             | 0.1984 | -47% | 0.2663              | 0.3422 | -29% |
| 16×10 <sup>3</sup>    | 0.1389             | 0.1173 | 16%  | 0.1295             | 0.1256 | 3%   | 0.1717              | 0.2884 | -68% |
| 32×10 <sup>3</sup>    | 0.1418             | 0.1091 | 23%  | 0.1527             | 0.1328 | 13%  | 0.2495              | 0.2407 | 4%   |
| 64×10 <sup>3</sup>    | 0.1264             | 0.1222 | 3%   | 0.1314             | 0.1751 | -33% | 0.1744              | 0.2062 | -18% |
| 128×10 <sup>3</sup>   | 0.1684             | 0.16   | 5%   | 0.2219             | 0.1937 | 13%  | 0.1784              | 0.1916 | -7%  |
| 256×10 <sup>3</sup>   | 0.1439             | 0.1196 | 17%  | 0.179              | 0.1858 | -4%  | 0.2126              | 0.2595 | -22% |
| 512×10 <sup>3</sup>   | 0.1706             | 0.1382 | 19%  | 0.2524             | 0.2655 | -5%  | 0.2579              | 0.2221 | 14%  |

Note: “C” represents control wells, “I” represents inhibition wells, and “IR” represents inhibition rate. The inhibitory concentration of CPPU was 100 ng/mL.

**Table S8.** The checked ic-ELISA result of 1B6.

| Dilution of immunogen | 2×10 <sup>3</sup>  |        |       | 4×10 <sup>3</sup>  |        |       | 16×10 <sup>3</sup>  |        |        |
|-----------------------|--------------------|--------|-------|--------------------|--------|-------|---------------------|--------|--------|
| (Serum dilution)      | C                  | I      | IR    | C                  | I      | IR    | C                   | I      | IR     |
| 4×10 <sup>3</sup>     | 3.6744             | 0.4424 | 88.0% | 3.142              | 0.2573 | 91.8% | 1.5635              | 0.1544 | 90.1%  |
| 8×10 <sup>3</sup>     | 2.5093             | 0.2898 | 88.5% | 2.3126             | 0.1773 | 92.3% | 1.2                 | 0.1579 | 86.8%  |
| 16×10 <sup>3</sup>    | 1.5815             | 0.1852 | 88.3% | 1.3101             | 0.1238 | 90.6% | 0.7002              | 0.1264 | 81.9%  |
| 32×10 <sup>3</sup>    | 1.0341             | 0.1436 | 86.1% | 0.7535             | 0.111  | 85.3% | 0.4285              | 0.1375 | 67.9%  |
| 64×10 <sup>3</sup>    | 0.5331             | 0.0926 | 82.6% | 0.456              | 0.0823 | 82.0% | 0.2991              | 0.1149 | 61.6%  |
| 128×10 <sup>3</sup>   | 0.3113             | 0.0811 | 73.9% | 0.2672             | 0.0757 | 71.7% | 0.177               | 0.1231 | 30.5%  |
| 256×10 <sup>3</sup>   | 0.2285             | 0.0792 | 65.3% | 0.2156             | 0.0748 | 65.3% | 0.1702              | 0.1355 | 20.4%  |
| 512×10 <sup>3</sup>   | 0.1397             | 0.0793 | 43.2% | 0.1353             | 0.077  | 43.1% | 0.1338              | 0.1353 | -1.1%  |
| Dilution of immunogen | 32×10 <sup>3</sup> |        |       | 64×10 <sup>3</sup> |        |       | 128×10 <sup>3</sup> |        |        |
| (Serum dilution)      | C                  | I      | IR    | C                  | I      | IR    | C                   | I      | IR     |
| 4×10 <sup>3</sup>     | 1.27               | 0.1335 | 89.5% | 0.7361             | 0.1654 | 77.5% | 0.6426              | 0.2429 | 62.2%  |
| 8×10 <sup>3</sup>     | 0.7881             | 0.1227 | 84.4% | 0.5176             | 0.1298 | 74.9% | 0.4248              | 0.1969 | 53.6%  |
| 16×10 <sup>3</sup>    | 0.4596             | 0.1333 | 71.0% | 0.3359             | 0.1577 | 53.1% | 0.2832              | 0.1709 | 39.7%  |
| 32×10 <sup>3</sup>    | 0.2739             | 0.1235 | 54.9% | 0.2165             | 0.1215 | 43.9% | 0.2316              | 0.2652 | -14.5% |
| 64×10 <sup>3</sup>    | 0.2365             | 0.1151 | 51.3% | 0.1783             | 0.1305 | 26.8% | 0.2284              | 0.1906 | 16.5%  |
| 128×10 <sup>3</sup>   | 0.153              | 0.1241 | 18.9% | 0.1557             | 0.1237 | 20.6% | 0.1622              | 0.1651 | -1.8%  |
| 256×10 <sup>3</sup>   | 0.1779             | 0.1159 | 34.9% | 0.1533             | 0.1538 | -0.3% | 0.1956              | 0.1837 | 6.1%   |
| 512×10 <sup>3</sup>   | 0.1314             | 0.1226 | 6.7%  | 0.1451             | 0.1547 | -6.6% | 0.1848              | 0.1758 | 4.9%   |

Note: “C” represents control wells, “I” represents inhibition wells, and “IR” represents inhibition rate. The inhibitory concentration of CPPU was 100 ng/mL.

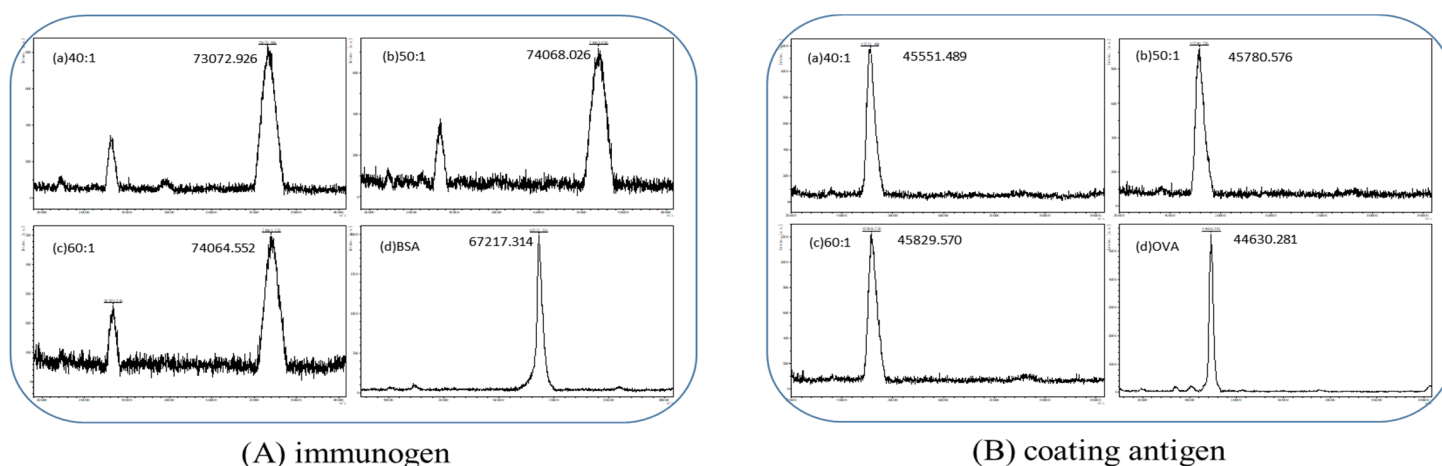

**Figure S1.** MALDI-TOF-MS results of the immunogen (A) and coating antigen (B).

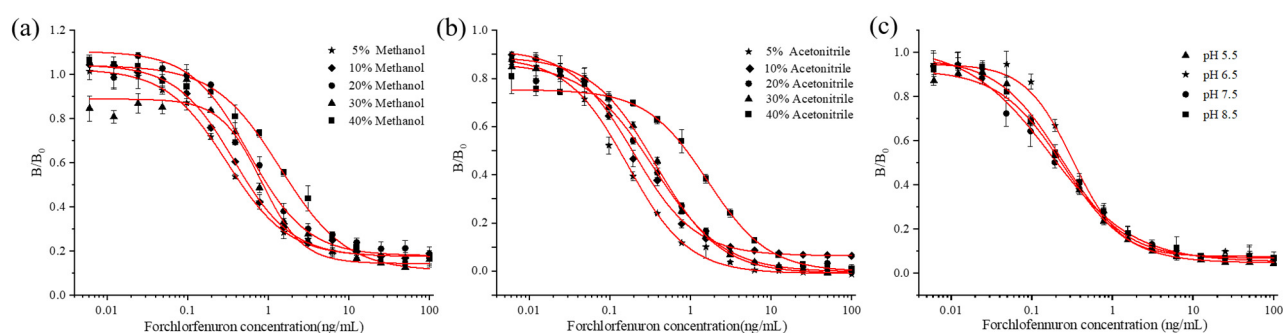

**Figure S2.** Optimization of ic-ELISA with different organic solvent contents and pH values in PBSTG buffer: (a) methanol, (b) acetonitrile, and (c) pH.

**Table S9.** Optimization of ic-ELISA with different organic solvent contents in PBSTG buffer.

| Methanol content                        | 5%    | 10%   | 20%   | 30%   | 40%   |
|-----------------------------------------|-------|-------|-------|-------|-------|
| IC <sub>50</sub>                        | 0.47  | 0.58  | 0.82  | 0.98  | 1.59  |
| IC <sub>80</sub>                        | 6.42  | 6.84  | 7.77  | 4.40  | 9.41  |
| IC <sub>20</sub>                        | 0.13  | 0.18  | 0.23  | 0.37  | 0.34  |
| R <sup>2</sup> of the calibration curve | 0.998 | 0.998 | 0.996 | 0.994 | 0.997 |
| Acetonitrile content                    | 5%    | 10%   | 20%   | 30%   | 40%   |
| IC <sub>50</sub>                        | 0.20  | 0.19  | 0.40  | 0.44  | 1.76  |
| IC <sub>80</sub>                        | 0.93  | 0.86  | 2.50  | 2.28  | 9.74  |
| IC <sub>20</sub>                        | 0.05  | 0.04  | 0.08  | 0.11  | 0.38  |
| R <sup>2</sup> of the calibration curve | 0.998 | 0.999 | 0.997 | 0.994 | 0.999 |

**Table S10.** Optimization of ic-ELISA with different pH values of PBSTG buffer.

| pH                                      | 5.5   | 6.5   | 7.5   | 8.5   |
|-----------------------------------------|-------|-------|-------|-------|
| IC <sub>50</sub>                        | 0.25  | 0.33  | 0.21  | 0.28  |
| IC <sub>80</sub>                        | 1.14  | 1.08  | 1.30  | 1.23  |
| IC <sub>20</sub>                        | 0.06  | 0.11  | 0.04  | 0.08  |
| R <sup>2</sup> of the calibration curve | 0.998 | 0.997 | 0.998 | 0.998 |

**Table S11.** LC–MS/MS detection conditions.

| Liquid Phase condition             |                                                        |                                      |
|------------------------------------|--------------------------------------------------------|--------------------------------------|
| Column                             | ACQUITY UPLC®BEH C18 column (100 mm × 2.1 mm., 1.7 μm) |                                      |
| Column Temperature                 | 40 °C                                                  |                                      |
| Inject Volume                      | 5 μL                                                   |                                      |
| Mobile Phases Flow                 | 0.3 mL/min                                             |                                      |
| Mobile Phases Consist              | A (0.1% Formic acid-H <sub>2</sub> O)                  | B (0.01 M Ammonium formate-Methanol) |
| Time(min)                          |                                                        |                                      |
| 0                                  | 10                                                     | 90                                   |
| 1.5                                | 90                                                     | 10                                   |
| 2.5                                | 90                                                     | 10                                   |
| 2.6                                | 10                                                     | 90                                   |
| 6                                  | 10                                                     | 90                                   |
| Mass Spectrum condition            |                                                        |                                      |
| Monitoring Ion and Pairs/Collision | 248/129*                                               | 30eV                                 |
| Energy                             | 248/155                                                | 17eV                                 |
| Scanning Mode                      | Multiple Reaction Monitoring (MRM)                     |                                      |
| Dwell Time                         | 100 ms                                                 |                                      |
| Ion Mode                           | ESI+                                                   |                                      |
| Nebulizing Gas                     | N <sub>2</sub>                                         |                                      |

|                        |                |
|------------------------|----------------|
| Nebulizing Gas Flow    | 3 L/min        |
| Heating Gas            | N <sub>2</sub> |
| Heating Gas Flow       | 10 L/min       |
| DL Temperature         | 250°C          |
| Heat Block Temperature | 400°C          |
| Drying Gas Flow        | 10 L/min       |

Note: \*Quantitative ion

**Table S12.** Anti-CPPU 9G9 mAb type.

| Antibody type       | IgG1   | IgA    | IgG2a  | IgG2b  | IgG3   | IgM    |
|---------------------|--------|--------|--------|--------|--------|--------|
| OD <sub>450nm</sub> | 1.7198 | 0.8808 | 0.8723 | 0.8317 | 0.8085 | 0.9189 |

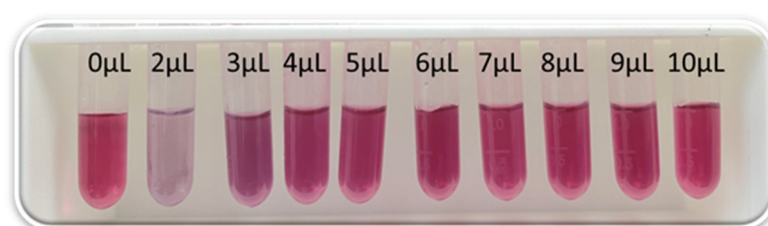

**Figure S3.** pH optimization of colloidal labeled antibody (the volume of K<sub>2</sub>CO<sub>3</sub>).

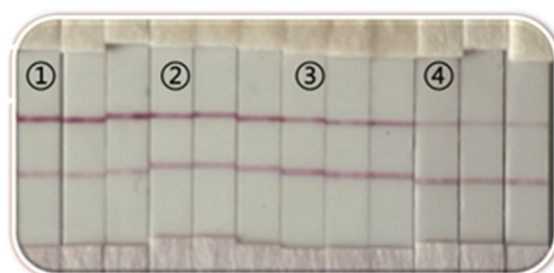

**Figure S4.** Optimization of coating antigen and second antibody concentration. (coating antigen/secondary antibody: ①2 and 1 mg/mL, ②1.5 and 0.8 mg/mL, ③3 and 0.4 mg/mL, ④4 and 0.2 mg/mL)

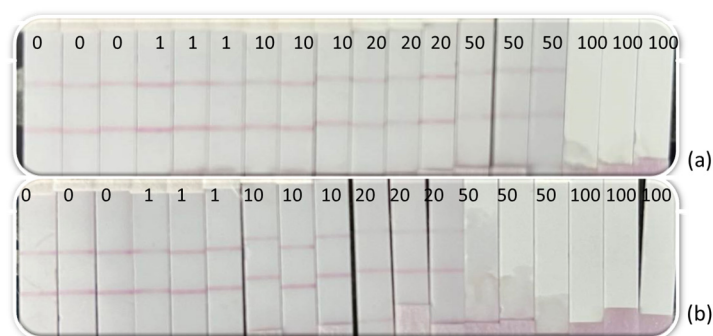

**Figure S5.** Organic solvent content on the strip: (a) methanol and (b) acetonitrile.

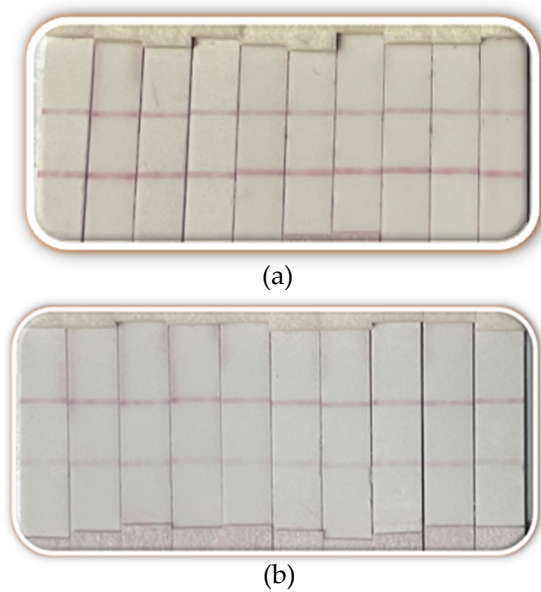

**Figure S6.** Test stability of CGN-ICTS (a) CK (b) 50 ng/mL.
